# Supplementary material
Source: ML conference proceedings conference paper supplement (https://openaccess.thecvf.com/content/WACV2023/html/Duan_Lossy_Image_Compression_WACV_2023_paper.html)

Resolution  $r = 192$ 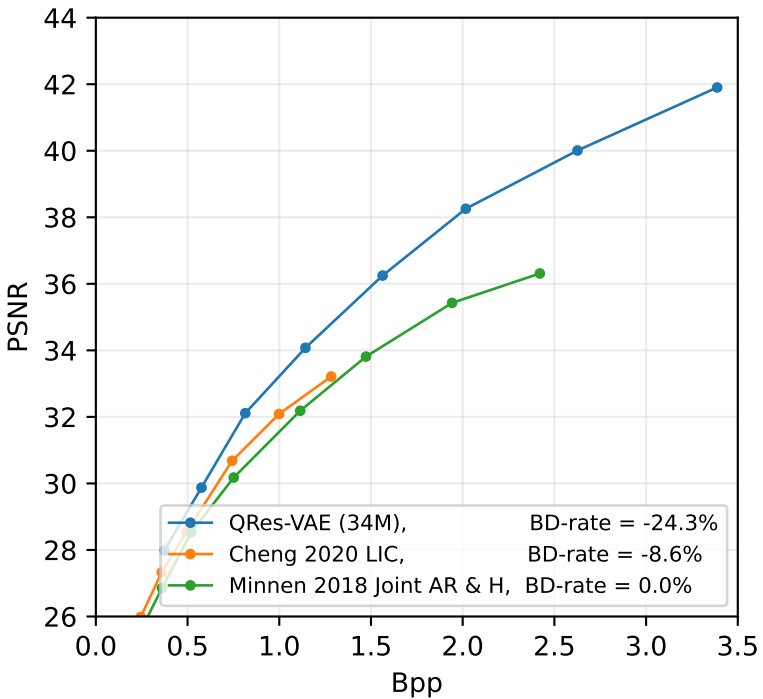Resolution  $r = 256$ 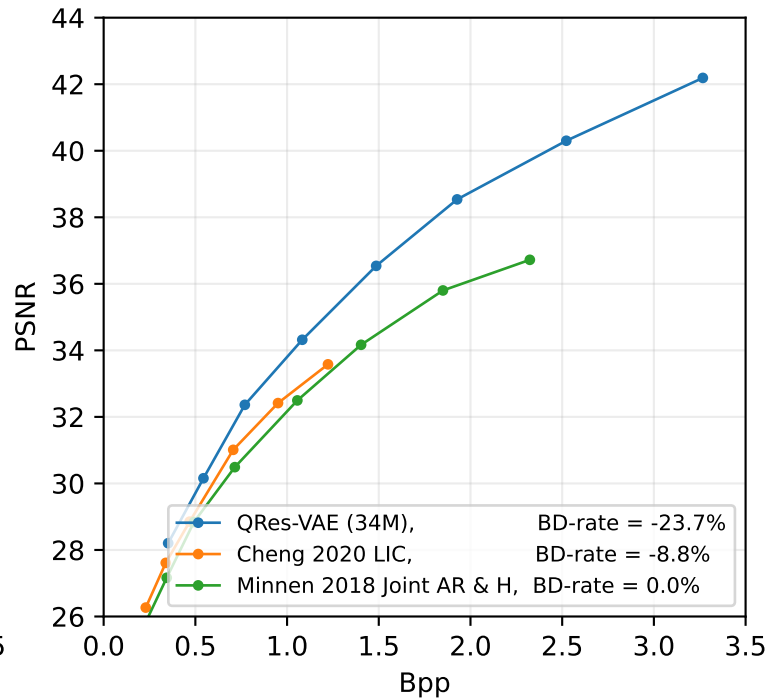Resolution  $r = 384$ 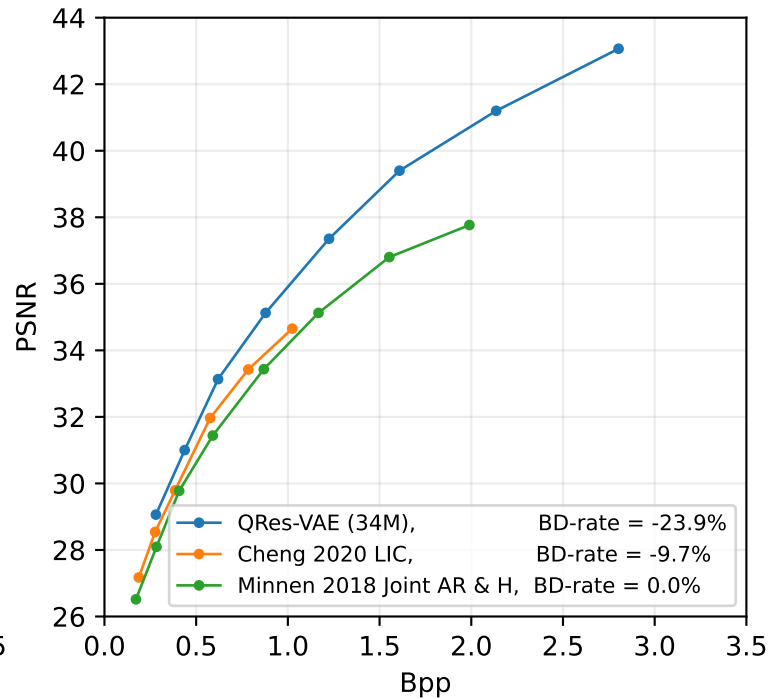Resolution  $r = 512$ 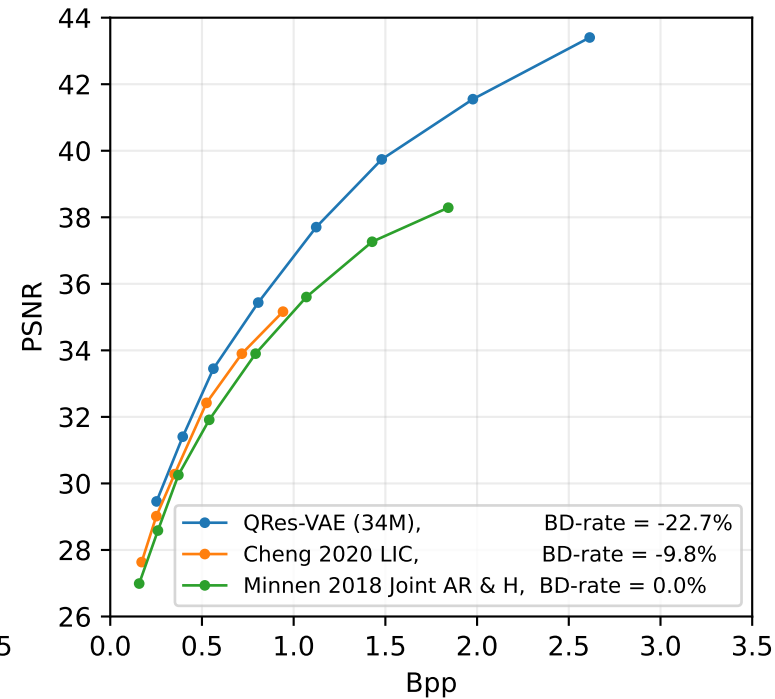Resolution  $r = 768$ 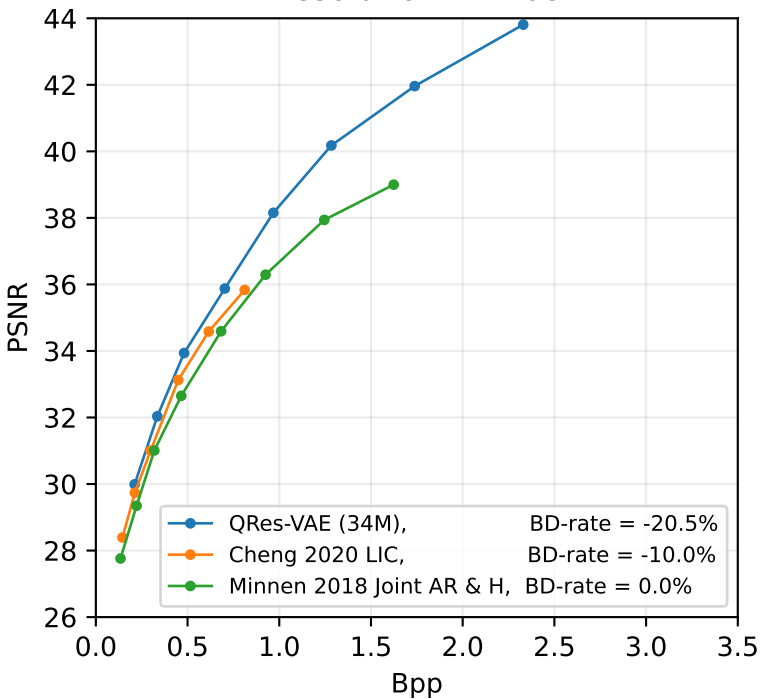Resolution  $r = 1024$ 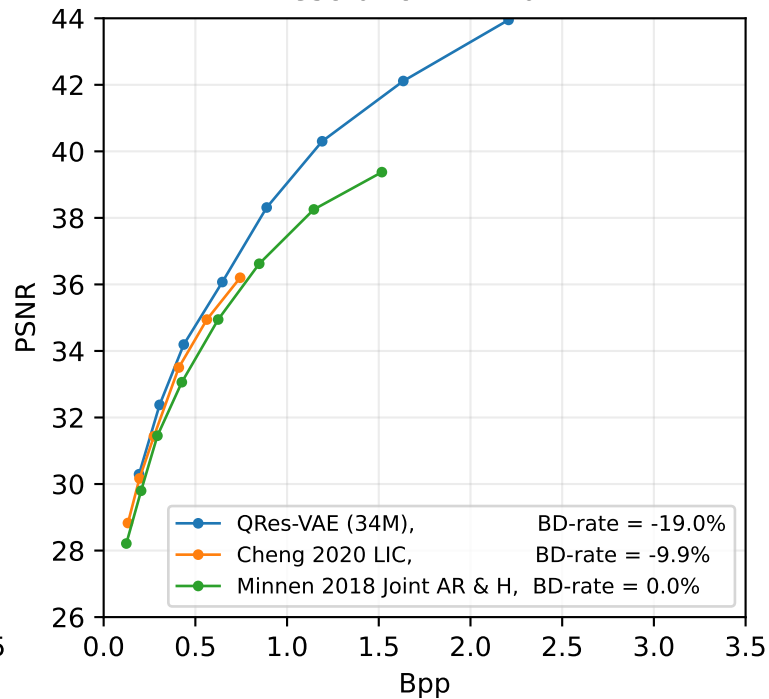Resolution  $r = 1536$ 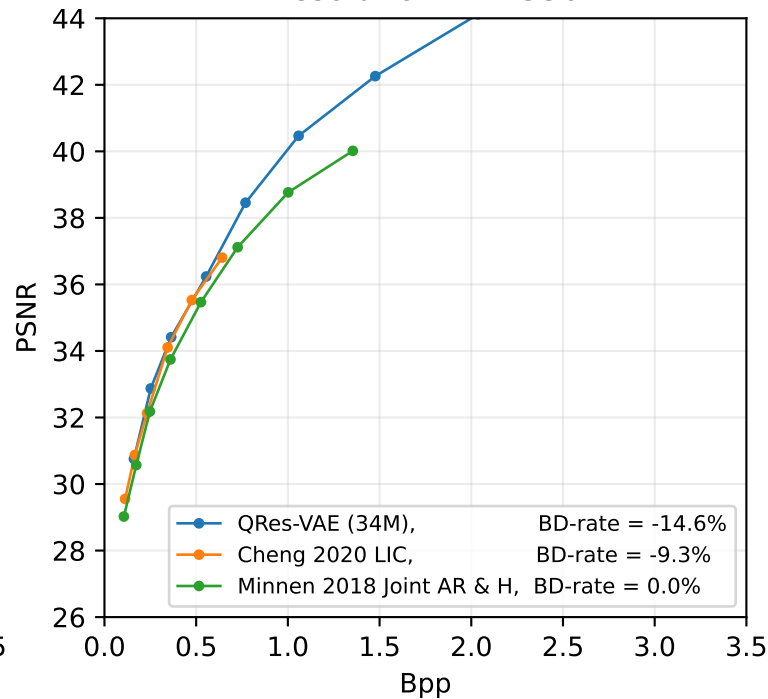Resolution  $r = 2048$ 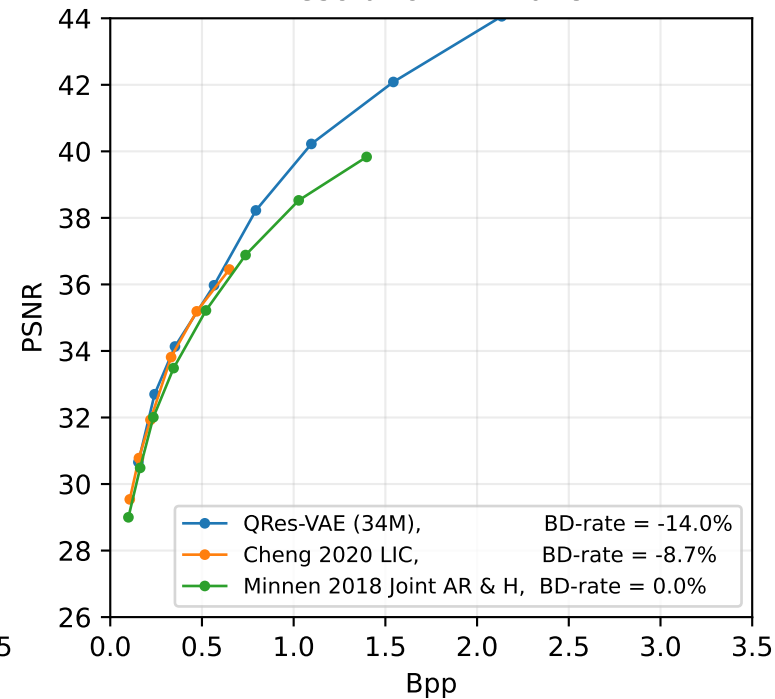

Supplement: Supplementary file 2 [file Duan_Lossy_Image_Compression_WACV_2023_supplemental.zip]
