# Supplementary material
Source: ML conference proceedings conference paper supplement (https://openaccess.thecvf.com/content/WACV2023/html/Duan_Lossy_Image_Compression_WACV_2023_paper.html)

Distribution of bit rates over latent variables

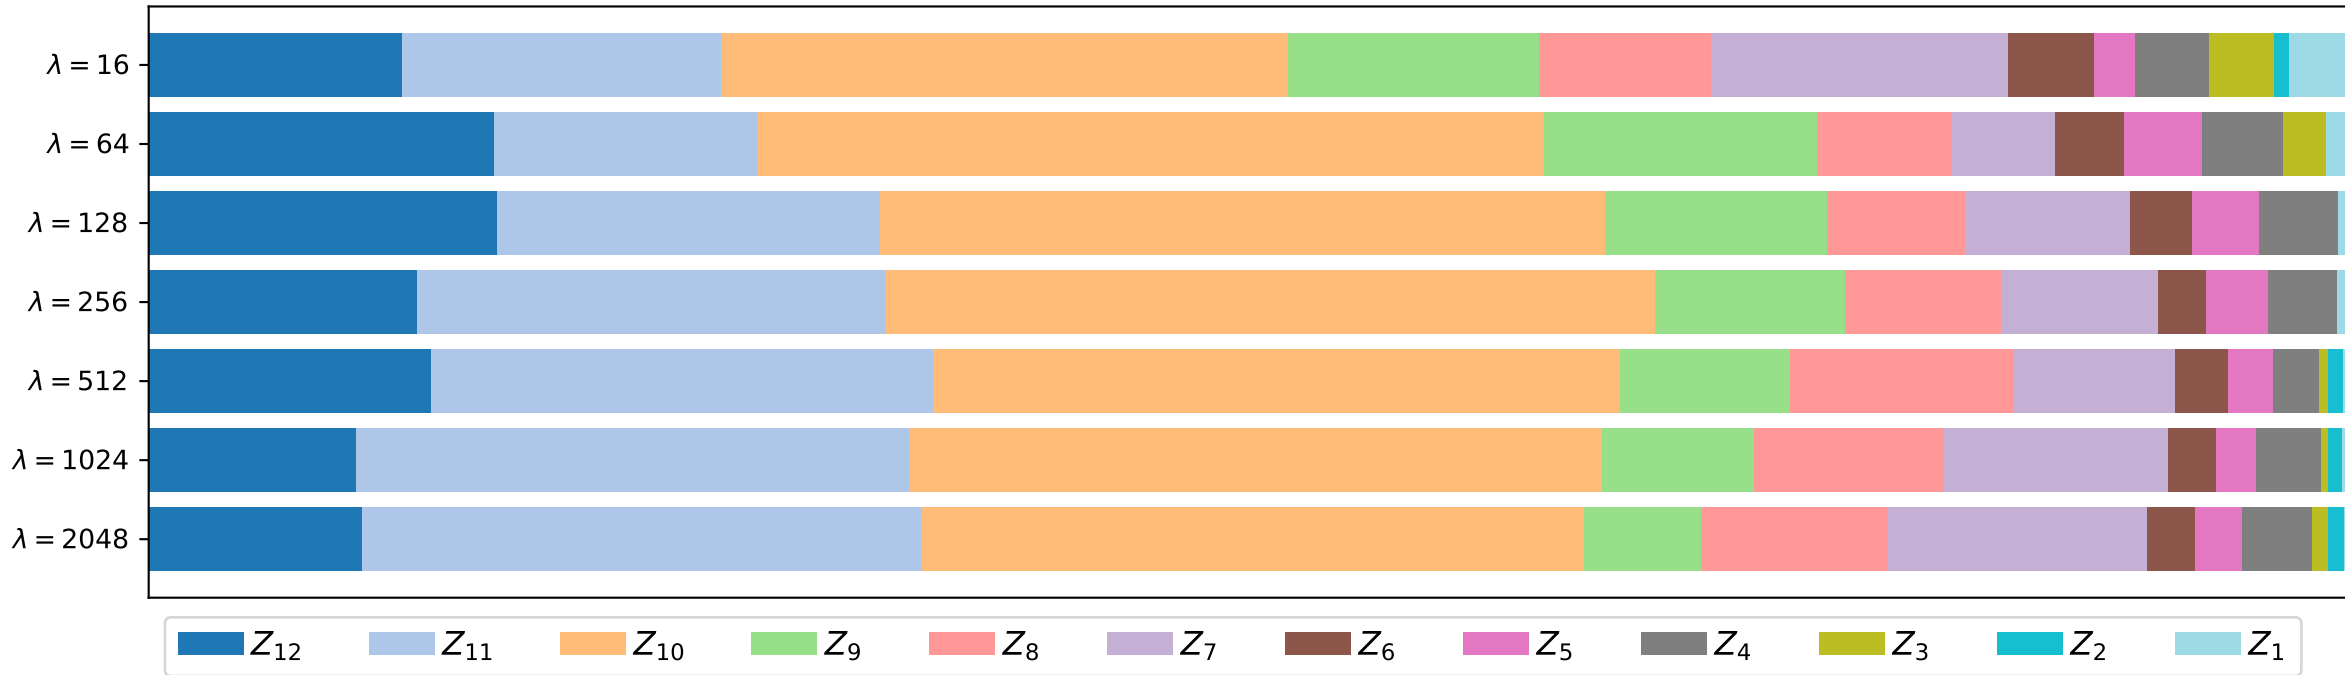

Supplement: Supplementary file 3 [file Duan_Lossy_Image_Compression_WACV_2023_supplemental.zip]
